# Supplementary material
Source: ML conference proceedings conference paper supplement (https://openreview.net/forum?id=sABwo1ZTFi)
Supplement: supplementary_material [file attachment]

# The Experiments For 《Generalizablity of Memorization Neural Network》

---

What we offer here is the code of algorithm in theorem 7.3.

1, 'Algorithm.py' is code of the algorithm in paper on dataset MNIST, and the accuracy was also tested in this file.

1.1, In line 20,21, 'yyinput' and 'yy2' are two labels, not more than 9; in line 23 and 24, 'num1' and 'num2' are how many data with label 'yyinput' and 'yy2' you want to get from the original dataset. These value can be changed to what you like within reason.

1.2, This file can be run directly.

1.3, See requirement for the Environment.

2, 'CIFAR-10-Result.py' is code that tests algorithm on all CIFAR10 binary classification problems.

2.1, This file can be run directly.

2.2, in line 28 and 29, 'num1' and 'num2' are how many data with two labels in dataset.
